# Supplementary material for: 2D Layered metal–organic frameworks built using a hexanuclear metallamacrocycle and an octanuclear metallamacrocycle as supramolecular building blocks
Source: Royal Society of Chemistry journal article supplement (doi:10.1039/b813603c), 2009-01-01
Supplement: b813603c.pdf [file b813603c.pdf]

# 2D Layered Metal-Organic Frameworks Built Using a Hexanuclear Metallamacrocyclic and an Octanuclear Metallamacrocyclic as Supramolecular Building Blocks

*Dohyun Moon, Jiheh Song, Myoung Soo Lah\**

Department of Chemistry and Applied Chemistry, College of Science and Technology, Hanyang  
University, Ansan, Kyunggi-do, 426-791, Korea

E-mail: [malah@hanyang.ac.kr](mailto:malah@hanyang.ac.kr)

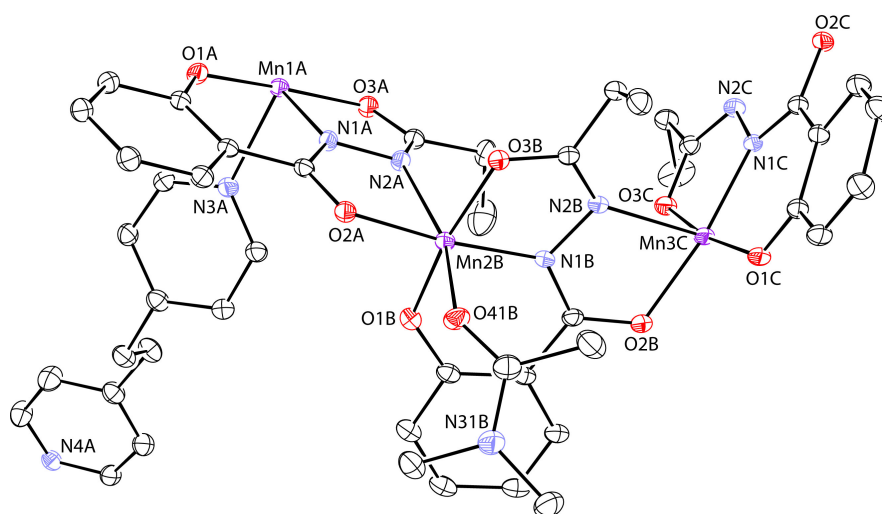

Figure S1. An ORTEP drawing of the asymmetric unit for the network, **2**, with 20% probability ellipsoids.

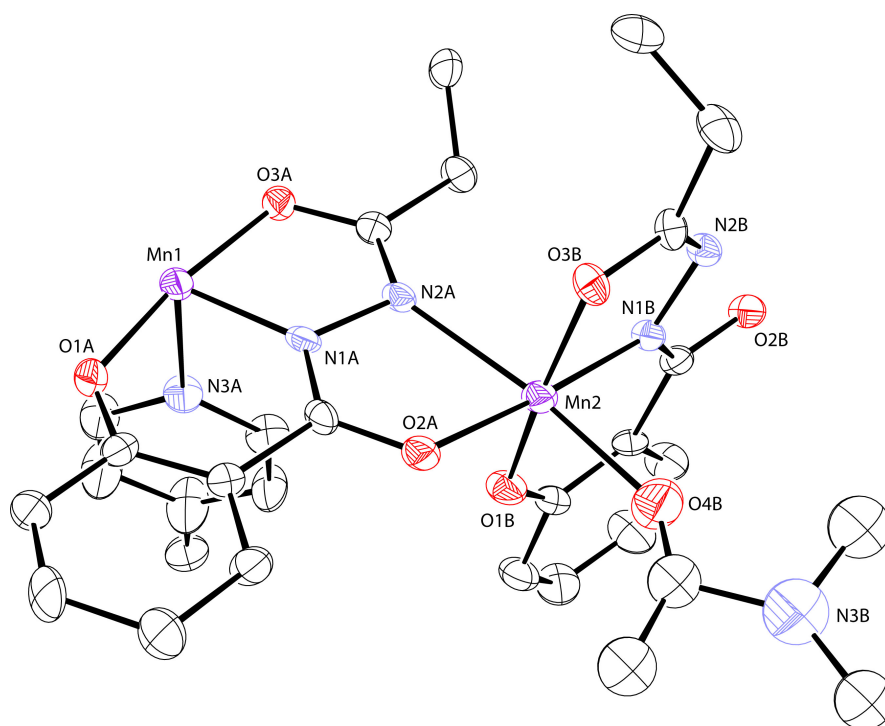

Figure S2. An ORTEP drawing of the asymmetric unit for the network, **3**, with 20% probability ellipsoids.

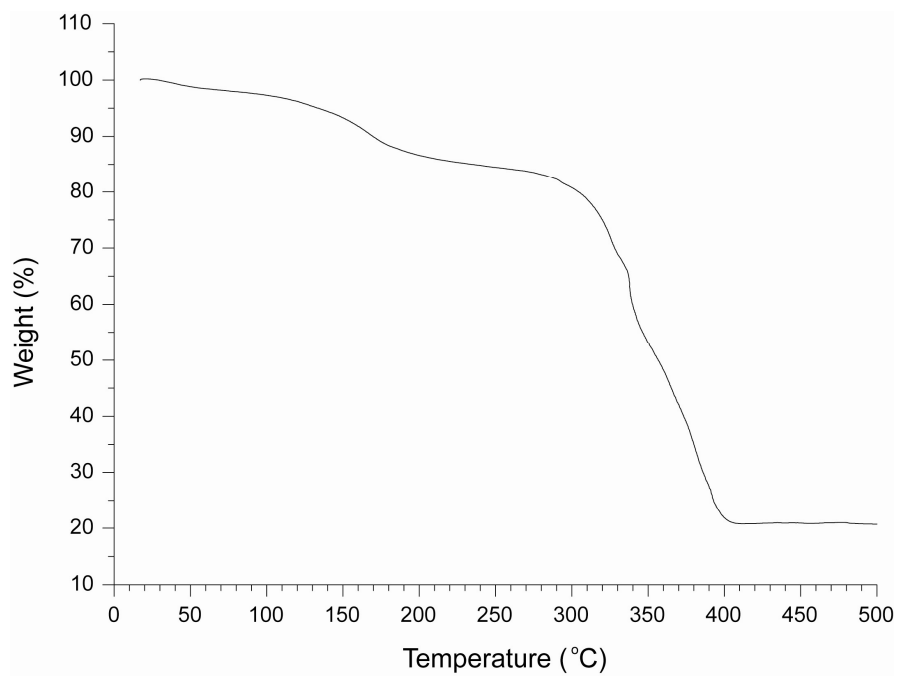

Figure S3. TGA data of for network 2.

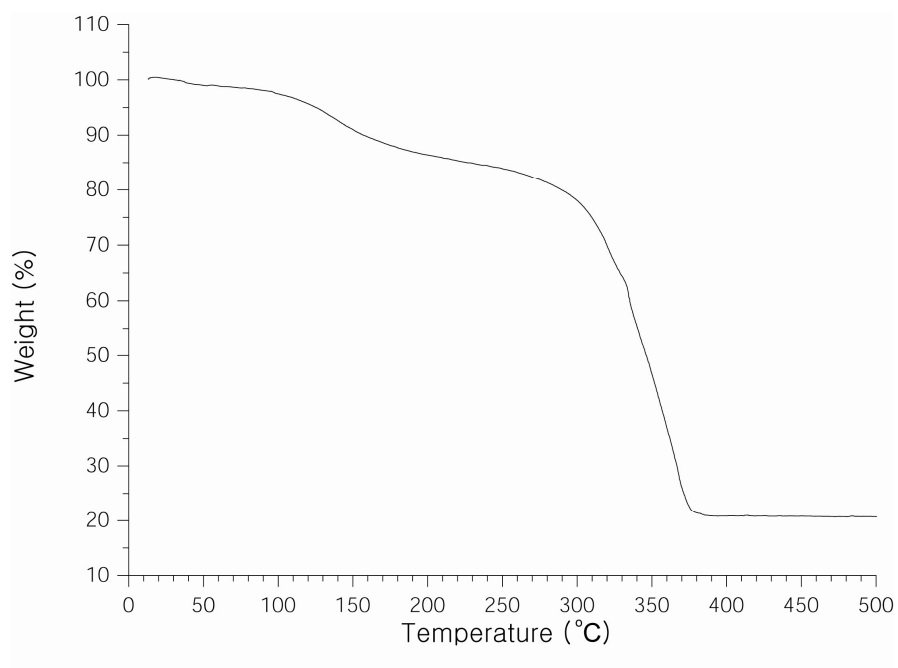

Figure S4. TGA data for network **3**.

Table S1. Crystal data and structure refinement for **2**.

|                                   |                                                                                   |                 |
|-----------------------------------|-----------------------------------------------------------------------------------|-----------------|
| Empirical formula                 | Mn <sub>6</sub> C <sub>104</sub> H <sub>120</sub> N <sub>21</sub> O <sub>24</sub> |                 |
| Formula weight                    | 1188.92                                                                           |                 |
| Temperature                       | 100(2) K                                                                          |                 |
| Wavelength                        | 0.80000 Å                                                                         |                 |
| Crystal system                    | Monoclinic                                                                        |                 |
| Space group                       | C2/c                                                                              |                 |
| Unit cell dimensions              | a = 16.675(3) Å                                                                   | α = 90°.        |
|                                   | b = 28.710(6) Å                                                                   | β = 100.23(3)°. |
|                                   | c = 23.663(5) Å                                                                   | γ = 90°.        |
| Volume                            | 11148(4) Å <sup>3</sup>                                                           |                 |
| Z                                 | 4                                                                                 |                 |
| Density (calculated)              | 1.417 Mg/m <sup>3</sup>                                                           |                 |
| Absorption coefficient            | 0.739 mm <sup>-1</sup>                                                            |                 |
| F(000)                            | 4932                                                                              |                 |
| Crystal size                      | 0.33 x 0.30 x 0.20 mm <sup>3</sup>                                                |                 |
| Theta range for data collection   | 1.88 to 30.40°.                                                                   |                 |
| Index ranges                      | -21 ≤ h ≤ 21, -36 ≤ k ≤ 36, -29 ≤ l ≤ 29                                          |                 |
| Reflections collected             | 39781                                                                             |                 |
| Independent reflections           | 11692 [R(int) = 0.0598]                                                           |                 |
| Completeness to theta = 30.40°    | 99.0 %                                                                            |                 |
| Absorption correction             | Empirical                                                                         |                 |
| Max. and min. transmission        | 0.8664 and 0.7926                                                                 |                 |
| Refinement method                 | Full-matrix least-squares on F <sup>2</sup>                                       |                 |
| Data / restraints / parameters    | 11692 / 0 / 718                                                                   |                 |
| Goodness-of-fit on F <sup>2</sup> | 1.048                                                                             |                 |
| Final R indices [I > 2σ(I)]       | R1 = 0.0646, wR2 = 0.1823                                                         |                 |
| R indices (all data)              | R1 = 0.0675, wR2 = 0.1849                                                         |                 |
| Largest diff. peak and hole       | 1.381 and -0.840 e.Å <sup>-3</sup>                                                |                 |

Table S2. Crystal data and structure refinement for **3**.

|                                   |                                                                              |                       |
|-----------------------------------|------------------------------------------------------------------------------|-----------------------|
| Empirical formula                 | $\text{Mn}_8\text{C}_{165}\text{H}_{233.25}\text{N}_{35.25}\text{O}_{39.25}$ |                       |
| Formula weight                    | 3778.14                                                                      |                       |
| Temperature                       | 173(2) K                                                                     |                       |
| Wavelength                        | 0.71073 Å                                                                    |                       |
| Crystal system                    | Tetragonal                                                                   |                       |
| Space group                       | <i>P4/ncc</i>                                                                |                       |
| Unit cell dimensions              | $a = 26.988(3)$ Å                                                            | $\alpha = 90^\circ$ . |
|                                   | $b = 26.988(3)$ Å                                                            | $\beta = 90^\circ$ .  |
|                                   | $c = 29.158(5)$ Å                                                            | $\gamma = 90^\circ$ . |
| Volume                            | 21238(5) Å <sup>3</sup>                                                      |                       |
| Z                                 | 4                                                                            |                       |
| Density (calculated)              | 1.182 Mg/m <sup>3</sup>                                                      |                       |
| Absorption coefficient            | 0.531 mm <sup>-1</sup>                                                       |                       |
| F(000)                            | 7936                                                                         |                       |
| Crystal size                      | 0.48 x 0.48 x 0.30 mm <sup>3</sup>                                           |                       |
| Theta range for data collection   | 1.51 to 22.00°.                                                              |                       |
| Index ranges                      | -27 ≤ h ≤ 24, -28 ≤ k ≤ 12, -30 ≤ l ≤ 30                                     |                       |
| Reflections collected             | 42577                                                                        |                       |
| Independent reflections           | 6531 [R(int) = 0.0990]                                                       |                       |
| Completeness to theta = 22.00°    | 100.0 %                                                                      |                       |
| Absorption correction             | Semi-empirical from equivalents                                              |                       |
| Max. and min. transmission        | 0.8571 and 0.7848                                                            |                       |
| Refinement method                 | Full-matrix least-squares on F <sup>2</sup>                                  |                       |
| Data / restraints / parameters    | 6531 / 7 / 401                                                               |                       |
| Goodness-of-fit on F <sup>2</sup> | 0.883                                                                        |                       |
| Final R indices [I > 2σ(I)]       | R1 = 0.0837, wR2 = 0.2243                                                    |                       |
| R indices (all data)              | R1 = 0.1522, wR2 = 0.2523                                                    |                       |
| Largest diff. peak and hole       | 0.616 and -0.261 e.Å <sup>-3</sup>                                           |                       |

Table S3. Close contact interactions [ $\text{\AA}$  and  $^\circ$ ] for **2**.

---

| CH $\cdots$ O interactions                |        |                 |                 |                |
|-------------------------------------------|--------|-----------------|-----------------|----------------|
| D-H $\cdots$ A                            | d(D-H) | d(H $\cdots$ A) | d(D $\cdots$ A) | $\angle$ (DHA) |
| C(12A)-H(12A) $\cdots$ O(1A) <sup>a</sup> | 0.95   | 2.55            | 3.394(6)        | 148            |
| C(6C)-H(6C) $\cdots$ O(1C) <sup>b</sup>   | 0.95   | 2.57            | 3.468(7)        | 158            |

  

| CH $\cdots$ $\pi$ interactions             |        |                 |                 |                |
|--------------------------------------------|--------|-----------------|-----------------|----------------|
| D-H $\cdots$ A                             | d(D-H) | d(H $\cdots$ A) | d(D $\cdots$ A) | $\angle$ (DHA) |
| C(13B) -H(13A) $\cdots$ C(3C) <sup>b</sup> | 0.98   | 3.12            | 3.558(6)        | 109            |
| C(13B) -H(13B) $\cdots$ C(4C) <sup>b</sup> | 0.98   | 3.05            | 3.589(7)        | 116            |

---

Symmetry transformations used to generate equivalent atoms: <sup>a</sup>  $1/2-x, -1/2-y, 1-z$ , <sup>b</sup>  $1/2-x, 1/2-y, 1-z$



Table S4. Close contact interactions [ $\text{\AA}$ ] for **3**.

---

$\pi\cdots\pi$  stacking interactions

Displacement of the ligated dma molecule from the best plane of the benzene group of the ligand

|                   |         |
|-------------------|---------|
| O4B <sup>a</sup>  | 3.65(1) |
| N3B <sup>a</sup>  | 3.67(1) |
| C11B <sup>a</sup> | 3.54(2) |
| C12B <sup>a</sup> | 3.50(2) |
| C13B <sup>a</sup> | 3.65(1) |
| C14B <sup>a</sup> | 3.75(2) |

---

Symmetry transformation used to generate equivalent atoms: <sup>a</sup> 2-x, 1-y, -z
